# Supplementary figures and images for: Biomonitoring of Heavy Metals Pollution in the University of Lagos, Akoka Campus Environment using the Moss Mnium Hornum Hedw
Source: Research Square preprint supplement (doi:10.21203/rs.3.rs-2926408/v1), 2023-05-24

**
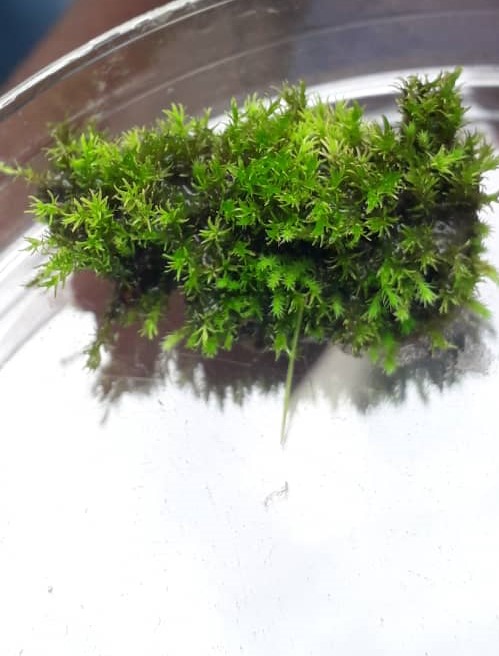
**

Plate 1: The Moss plant (*Mnium hornum*)

Supplement: Supplementary file 1 [file b1c1e8bb30f3353040d29fe6.docx]
